# Supplementary material
Source: Springer Nature journal article supplement (https://www.springermedizin.de/resource/supplementary/12887_2013_816_MOESM3_ESM.docx/9476294)
Supplement: MOESM3 [file 9476294]

**Table 2. Exclusion criteria.**

**General criteria:**

- Age < 5 or > 19 years
- Current or history of significant alcohol consumption
- Unlikely to co-operate in the study, to comply with study treatment or with the study visits.

**Medical and therapeutic criteria:**

1. **Concerning liver diseases:**
   - Past or active HBV infection
   - Past or active HCV infection
   - Chronic or acute liver failure
   - Cholestasis
   - Wilson disease
   - Cystic fibrosis
   - α1-antitripsin deficiency
   - Autoimmune hepatitis
   - Tyrosinemia
   - Galactosemia
   - Beta-oxidation disorders
   - Any recognized liver disease presenting with elevated ALT other than NAFLD/NASH
2. **Concerning other concomitant diseases or associated clinical conditions:**
   - History of diabetes mellitus
   - Familiar hypercholesterolemia
   - Hypothyroidism
   - Current or history of craniopharyngioma
   - Any medical condition that considered by physician can unable completion of the trial
3. **Concerning concomitant medications:**
   - Treatment with vitamin E, statins, UDCA, probiotics or metformin within 3 months prior to randomization
   - Pharmacological treatment of hypertension within 3 months prior to randomization
   - History of parenteral nutrition
